# Supplementary material for: Towards microfluidic-based depletion of stiff and fragile human red cells that accumulate during blood storage
Source: Royal Society of Chemistry journal article supplement (doi:10.1039/c4lc00768a), 2014-11-18
Supplement: c4lc00768a3.pdf [file c4lc00768a3.pdf]

## Supplementary Information

### Changes in RBC intracellular Calcium content over storage time

During blood storage, as adenosine 5 -triphosphate (ATP) decreases over time, an increase in RBC  $\text{Ca}^{2+}$  develops irreversibly.<sup>1</sup> Calcium influx is well known to promote eryptosis as well as microparticle formation, partially via phosphatidylserine externalization.<sup>2-5</sup>

In this work, we also investigated single RBC  $\text{Ca}^{2+}$  concentration in parallel to the deformability measurement (Figure S1 B). The intracellular  $\text{Ca}^{2+}$  level was found to increase steadily for the first 2 – 3 weeks of storage, and then remained fairly unchanged up to week 5. Scatter plots were also generated mapping out both  $\text{Ca}^{2+}$  and velocity (deformability) of individual RBCs from the same blood source on different storage days (Figure S1 B).

We also noted that the  $\text{Ca}^{2+}$  staining protocol may introduce additional stiffening effect on banked RBCs given the additional hours required for sample preparation and the exposure of RBCs to a buffer containing 1.8mM  $\text{Ca}^{2+}$  ions (i.e. Calcium influx). For that reason, we verified our deformability measurement using cell tracker orange dye (Figure S2 B). RBCs collected from the side outlet exhibited significant stiffening similar to that observed with  $\text{Ca}^{2+}$  staining.

1. A. B. Zimrin and J. R. Hess, *Vox Sanguinis*, 2009, 96, 93-103.
2. F. Lang, K. S. Lang, P. A. Lang, S. M. Huber and T. Wieder, *Acta Physiologica*, 2006, 187, 191-198.
3. E. Lang, S. M. Qadri and F. Lang, *The International Journal of Biochemistry & Cell Biology*, 2012, 44, 1236-1243.
4. M. H. Antonelou, A. G. Kriebardis and I. S. Papassideri, *Blood Transfusion*, 2010, 8.
5. F. Lang, E. Gulbins, H. Lerche, S. M. Huber, D. S. Kempe and M. Föller, *Cellular Physiology and Biochemistry*, 2008, 22, 373-380.
